# Supplementary material for: Manganese(iii) acetate mediated synthesis of oxygen heterocycles. Influence of copper(ii) salts on product distributionElectronic supplementary information (ESI) available: spectroscopic data. See http://www.rsc.org/suppdata/ob/b4/b402411g/
Source: Royal Society of Chemistry journal article supplement (doi:10.1039/b402411g), 2004-01-01
Supplement: b402411g.doc [file b402411g.doc]

Supplementary Data

**Manganese(III) acetate mediated synthesis of oxygen heterocycles. Influence of copper(II) salts on product distribution.**

David G. Hulcoop, Helen M. Sheldrake and Jonathan W. Burton*

Department of Chemistry, University of Cambridge, Lensfield Road, Cambridge, UK CB2 1EW.

E-mail:jwb1004@cam.ac.uk

*Diastereomer 1*: *Rf* 0.7 (hexane: EtOAc, 1:1); **max(film)/cm-1 1731; **H(500 MHz; CDCl3) 3.92 (1H, ddd, *J* 8.0, 6.4 and 4.6), 3.79 (1H, dt, *J* 6.9 and 8.0); 3.70 (3H, s), 3.69 (3H, s), 3.65 (1H, dt, *J* 6.0 and 8.0), 2.77 (1H, ddd, *J* 10.1, 7.3 and 4.6), 2.49 (1H, dt, *J* 13.5 and 7.9), 1.98-1.78 (6H, m) and 1.73-1.50 (3H, m); **C(125 MHz; CDCl3) 173.3, 171.7, 78.2, 68.2, 62.1, 52.4, 52.3, 50.3, 35.4, 30.4, 26.0, 25.9 and 23.0; *m/z* (ES) [Found: (M + Na)+, 279.1203. C13H20O5Na requires *M*, 279.1208].

*Diastereomer 2*: *Rf* 0.6 (hexane: EtOAc, 1:1); **max(film)/cm-1 1727; **H(500 MHz; CDCl3) 3.86 (1H, dt, *J* 9.4 and 6.6), 3.83-3.72 (1H, m); 3.72 (3H, s), 3.69 (3H, s), 3.66 (1H, dt, *J* 5.8 and 7.4), 2.82 (1H, dt, *J* 9.4 and 8.0), 2.38 (1H, dt, *J* 13.4 and 8.4), 2.17 (1H, ddd, *J* 13.4, 7.8 and 4.2), 1.96-1.71 (5H, m), 1.59-1.71 (2H, m) and 1.38 (1H, dq, *J* 12.8 and 8.0); **C(125 MHz; CDCl3) 171.7, 79.1, 67.6, 62.7, 52.6, 52.2, 51.0, 35.2, 30.3, 27.9, 25.5 and 22.9; *m/z* (ES) [Found: (M + Na)+, 279.1215. C13H20O5Na requires *M*, 279.1208].

*Diastereomer 1*: *Rf* 0.7 (hexane: EtOAc, 1:1); **max(film)/cm-1 1725; **H(400 MHz; CDCl3) 4.01 (1H, dt, *J* 8.2 and 5.5), 3.75 (1H, dt, *J* 8.3 and 7.3), 3.70 (6H, s), 3.65 (1H, dt, *J* 5.5 and 8.2), 2.30-2.24 (1H, m), 2.22-2.17 (1H, m), 1.92-1.72 (2H, m), 1.71-1.57 (3H, m), 1.50-1.40 (3H, m) and 1.37-1.21 (3H, m); **C(125 MHz; CDCl3) 173.1, 171.5, 79.6, 67.4, 57.9, 52.4, 52.1, 45.6, 32.4, 30.1, 26.0, 24.2, 24.0 and 22.8; *m/z* (ES) [Found: (M + Na)+, 293.1367. C14H22O5Na requires *M*, 293.1365].

*Diastereomer 2*: *Rf* 0.6 (hexane: EtOAc, 1:1); **max(film)/cm-1 1731; **H(500 MHz; CDCl3) 4.33 (1H, dt, *J* 9.8 and 6.5), 3.74 (3H, s), 3.68 (3H, s), 3.67-3.58 (2H, m), 2.34-2.26 (1H, m), 2.09-1.98 (2H, m), 1.74-1.09 (3H, m), 1.62 (4H, m) and 1.36-1.23 (3H, m); **C(125 MHz; CDCl3) 173.5, 171.5, 79.4, 67.7, 57.5, 52.3, 52.0, 48.9, 33.2, 31.3, 25.8, 25.7, 24.2 and 23.1; *m/z* (ES) [Found: (M + Na)+, 293.1351. C14H22O5Na requires *M*, 293.1365].

*Diastereomer 1*: *Rf* 0.7 (hexane: EtOAc, 1:1); **max(film)/cm-1 1733; **H(400 MHz; CDCl3) 3.87-3.82 (1H, m), 3.70 (3H, s), 3.66 (3H, s), 3.57 (1H, dt, *J* 10.6 and 1.8), 3.25 (1H, dt, *J* 2.8 and 11.2), 2.63 (1H, dt, *J* 2.0 and 9.0), 2.53-2.44 (1H, m), 1.91-1.84 (2H, m), 1.84-1.75 (3H, m), 1.56-1.43 (4H, m) and 1.43-1.38 (2H, m); *m/z* (ES) [Found: (M + Na)+, 293.1362. C14H22O5Na requires *M*, 293.1365].

*Diastereomer 2*: *Rf* 0.6 (hexane: EtOAc, 1:1); **max(film)/cm-1 1728; **H(700 MHz; CDCl3) 3.88-3.84 (1H, m), 3.75 (3H, s), 3.70 (3H, s), 3.26 (1H, dt, *J* 2.2 and 11.6), 3.20 (1H, dt, *J* 1.8 and 10.2), 2.90 (1H, dt, *J* 10.2 and 8.2), 2.34-2.27 (2H, m), 1.87-1.83 (2H, m), 1.79-1.71 (1H, m), 1.68-1.63 (1H, m), 1.62-1.56 (1H, m), 1.50-1.34 (4H, m) and 1.34-1.20 (1H, m); **C(125 MHz; CDCl3) 173.4, 172.1, 78.2, 68.5, 62.3, 52.7, 52.2, 51.3, 35.9, 29.8, 28.1, 25.7, 23.8 and 23.6; *m/z* (ES) [Found: (M + Na)+, 293.1361. C14H22O5Na requires *M*, 293.1365].

*Diastereomer 1*: *Rf* 0.8 (hexane: EtOAc, 1:1); **max(film)/cm-1 1730; **H(400 MHz; CDCl3) 3.86-3.81 (1H, m), 3.70 (3H, s), 3.67 (3H, s), 3.50 (1H, dt, *J* 8.8 and 2.0), 3.25 (1H, dt, *J* 2.68 and 12.0), 2.30 (1H, dt, *J* 12.0 and 5.0), 1.98 (1H, dt, *J* 11.4 and 2.6), 1.84-1.71 (3H, m), 1.55-1.40 (3H, m), 1.30-1.19 (3H, m) and 0.90-0.81 (4H, m); *m/z* (ES) [Found: (M + Na)+, 307.1530. C15H24O5Na requires *M*, 307.1521].

*Diastereomer 2*: *Rf* 0.7 (hexane: EtOAc, 1:1); **max(film)/cm-1 1731; **H(400 MHz; CDCl3) 3.82-3.72 (1H, m), 3.71-3.61 (1H, m), 3.68 (3H, s), 3.66 (3H, s), 3.27 (1H, dt, *J* 2.2 and 11.2), 2.24-2.18 (1H, m), 2.14-2.00 (2H, m), 1.96-1.90 (1H, m), 1.86-1.78 (1H, m), 1.73-1.63 (2H, m), 1.60-1.10 (6H, m) and 0.89-0.82 (1H, m); **C(125 MHz; CDCl3) 172.9, 171.7, 77.5, 68.3, 56.9, 53.1, 51.6, 51.8, 31.2, 31.1, 29.1, 25.7, 24.0, 23.4 and 22.7; *m/z* (ES) [Found: (M + Na)+, 307.1522. C15H24O5Na requires *M*, 307.1521].

*Rf* 0.4 (hexane: EtOAc, 1:1); **max(film)/cm-1 1774, 1745; **H(400 MHz; CDCl3) 4.00-3.93 (1H, m), 3.84 (1H, dt, *J* 8.0 and 6.4), 3.80-3.70 (1H, m), 3.75 (3H, s), 3.09 (1H, dt, *J* 8.0 and 2.6), 2.32-2.25 (2H, m), 2.10-1.98 (2H, m), 1.98-1.89 (2H, m), 1.89-1.82 (1H, m), 1.82-1.69 (2H, m), 1.63-1.50 (1H, m) and 0.89-0.82 (1H, m); **C(125 MHz; CDCl3) 175.8, 171.0, 86.6, 79.6, 68.4, 61.9, 52.8, 47.5, 35.9, 34.3. 27.9, 25.6 and 25.4; *m/z* (ES) [Found: (M + Na)+, 277.1050. C13H18O5Na requires *M*, 277.1052].

*Rf* 0.5 (hexane: EtOAc, 1:1); **max(film)/cm-1 1729 **H(400 MHz; CDCl3) 5.72 (1H, dt, *J* 8.3 and 2.5), 3.89 (1H, q, *J* 7.8), 3.77-3.70 (2H, m), 3.72 (3H, s), 3.71 (3H, s), 2.55-2.47 (1H, m), 2.41-2.30 (2H, m), 2.26-2.18 (1H, m), 2.12-2.02 (1H, m), 2.00-1.84 (2H, m), 1.80-1.67 (2H, m) and 1.64-1.56 (1H, m); **C(125 MHz; CDCl3) 171.5, 170.9, 140.7, 128.9, 77.1, 67.9, 64.1, 52.8, 52.7, 34.2, 35.9, 29.6, 25.7 and 23.1; *m/z* (ES) [Found: (M + Na)+, 291.1203. C14H20O5Na requires *M*, 291.1208].

*Rf* 0.7 (hexane: EtOAc, 1:1); **max(film)/cm-1 1725; **H(400 MHz; CDCl3) 4.45 (1H, t, *J* 5.8), 3.70 (3H, s), 3.68 (3H, s), 3.65-3.58 (2H, m), 3.51-3.43 (2H, m), 2.04-1.96 (1H, m), 1.96-1.89 (1H, m), 1.90-1.76 (1H, m), 1.62-1.48 (4H, m), 1.46-1.22 (5H, m), 1.18 (6H, t, *J* 7.0), 1.08-0.98 (1H, m) and 0.90-0.83 (2H, m); **C(125 MHz; CDCl3) 173.1, 172.1, 102.9, 63.6, 60.9, 52.4, 52.0, 46.4, 34.5, 33.6, 31.3, 30.7, 29.7, 24.9, 23.0 and 15.4; *m/z* (ES) [Found: (M + Na)+, 367.2080. C18H32O6Na requires *M*, 367.2097].

*Rf* 0.6 (hexane: EtOAc, 1:1); **max(film)/cm-1 1725; **H(400 MHz; CDCl3) 9.75 (1H, s), 3.70 (3H, s), 3.69 (3H, s), 2.52-2.35 (4H, m), 2.04-1.96 (1H, m), 1.96-1.88 (1H, m), 1.88-1.75 (1H, m), 1.70-1.52 (3H, m), 1.45-1.20 (4H, m) and 1.10-1.00 (1H, m); **C(125 MHz; CDCl3) 202.7, 173.1, 172.0, 63.4, 52.5, 52.1, 46.2, 43.8, 34.5, 31.0, 30.7, 28.0, 23.0 and 22.1; *m/z* (ES) [Found: (M + Na)+, 293.1357. C14H22O5Na requires *M*, 293.1365].

*Rf* 0.1 (hexane: EtOAc, 1:1); **max(film)/cm-1 3451, 1769, 1740; **H(700 MHz; CDCl3, 1:1 mixture of diastereomers) 4.69 (1H, dt, *J* 8.9 and 5.4), 4.10-4.08 (1H, m), 3.80 (6H, s) 3.71-3.68 (4H, m), 2.98 (1H, q, *J* 7.4), 2.85 (1H, dt, *J* 8.2 and 3.4), 2.43-2.39 (1H m), 2.37 (1H, ddd, *J* 17.8, 6.7 and 4.4), 2.29 (1H, dd, *J* 13.7, 6.5, 2.9), 2.28-2.24 (1H, m), 1.98 (1H, ddd, *J* 12.3, 11.0, 8.2 and 6.5), 1.90-1.80 (4H, m), 1.75-1.56 (15H, m) and 1.37-1.30 (2H, br); **C(125 MHz; CDCl3, 1:1 mixture of diastereomers) 176.0, 175.5, 171.1, 170.6, 86.0, 81.0, 63.6, 62.6, 62.5, 62.3, 53.2, 53.1, 50.8, 50.1, 36.0, 35.6, 34.2, 34.0, 32.3, 32.2, 30.6, 27.1, 26.4, 25.7, 22.5 and 21.7; *m/z* (ESI) 279.13 (M + Na)+, 100%.

*Rf* 0.25 (hexane: EtOAc, 1:1); **max(film)/cm-1 3615, 1726; **H(400 MHz; CDCl3) 5.63 (1H, tt, *J* 7.7 and 2.8), 3.71 (6H, s), 3.63 (2H, t, *J* 5.8), 2.35 (2H, tt, *J* 7.0 and 1.0), 2.30 (2H, t, *J* 6.6), 2.09 (2H, q, *J* 7.0), 1.72 (2H, qn, *J* 7.0), 1.61-1.44 (4H, m) and 1.34-1.27 (1H, br s); **C(125 MHz; CDCl3) 171.5, 138.8, 127.5, 63.7, 62.5, 52.4, 36.0, 32.0, 29.2, 24.9 and 23.7; *m/z* (ES) [Found: (M + Na)+, 293.1373. C14H22O5Na requires *M*, 293.1365].

*Rf* 0.3 (hexane: EtOAc, 1:1); **max(film)/cm-1 3625, 1726; **H(400 MHz; CDCl3) 5.52 (1H, dtd, *J* 15.0, 6.4 and 0.4), 5.39 (1H, ddt, *J* 15.0, 8.0 and 0.8), 3.70 (3H, s), 3.64 (3H, s), 3.61 (2H, t, *J* 6.4), 3.19 (1H, q, *J* 8.0), 2.47-2.39 (1H, m), 2.10-1.97 (4H, m), 1.94-1.79 (2H, m), 1.63-1.52 (2H, m) and 1.42-1.32 (2H, m); **C(125 MHz; CDCl3) 172.7, 171.3, 131.2, 129.6, 64.1, 62.1, 52.2, 51.8, 48.9, 33.7, 31.9, 31.1, 28.7 and 22.9; *m/z* (ES) [Found: (M + Na)+, 293.1365. C14H22O5Na requires *M*, 293.1365].

*Rf* 0.6 (hexane: EtOAc, 1:1); **max(film)/cm-1 1777, 1739; **H(400 MHz; CDCl3) 3.94 (1H, ddt, *J* 11.2, 1.6 and 4.6), 3.87 (1H, dd, *J* 6.2 and 3.2), 3.76 (3H, s), 3.40 (1H, dd, *J* 11.3 and 3.3), 3.36 (1H. ddd, *J* 11.3, 6.2 and 2.0), 3.18 (1H, dt, *J* 8.5, and 3.2), 2.30-2.24 (2H, m), 2.06-1.98 (1H, m), 1.90-1.80 (2H, m), 1.80-1.73 (1H, m), 1.73-1.65 (1H, m), 1.61-1.46 (3H, m), 1.34-1.22 (H, m); **C(125 MHz; CDCl3) 175.8, 171.2, 87.0, 78.2, 68.5, 61.7, 52.9, 47.1, 36.4, 34.6, 27.9, 25.9, 25.8 and 22.6; *m/z* (ES) [Found: (M + Na)+, 291.1196. C14H20O5Na requires *M*, 291.1208].

Data for the major alkene product is given; *Rf* 0.3 (hexane: EtOAc, 1:1); **max(film)/cm-1 3488, 1732; **H(400 MHz; CDCl3) 5.73 (1H, ddt, *J* 15.0, 9.6 and 1.2), 5.41 (1H, dt, *J* 15.0 and 6.8), 3.68 (3H, s), 3.67 (3H, s), 3.61 (2H, t, *J* 6.6), 2.75-2.68 (1H, m), 2.15-1.86 (8H, m), 1.82-1.74 (2H, m), 1.63-1.20 (3H, m); *m/z* (ES) [Found: (M + Na)+, 307.1522. C15H24O5Na requires *M*, 307.1521].
